# Supplementary material
Source: bioRxiv or medRxiv preprint supplement (https://www.biorxiv.org/highwire/filestream/29149/field_highwire_adjunct_files/0/100628-1.pdf)
Supplement: Supplementary file [file 100628-1.pdf]

## **Supplementary Materials.**

**Figure S1: AP2IV-4 and AP2VI-1 expression during daughter budding.**

**Figure S2: Genetic knockout strategy for AP2IV-4.**

**Figure S3: Deletion of the AP2IV-4 gene in the PruQ strain leads to de-repression of bradyzoite surface and cyst wall mRNAs and proteins in the tachyzoite stage.**

### **Dataset S1**

Complete microarray results for all gene expression altered by knockout of AP2IV-4 in PruQ and RHCre strains.

### **Dataset S2**

Comparison of genes controlled by AP2IV-3, AP2IV-4, AP2IX-9, and AP2XI-4.

### **Dataset S3**

Full list of transgenic strains and oligonucleotides used in this study.

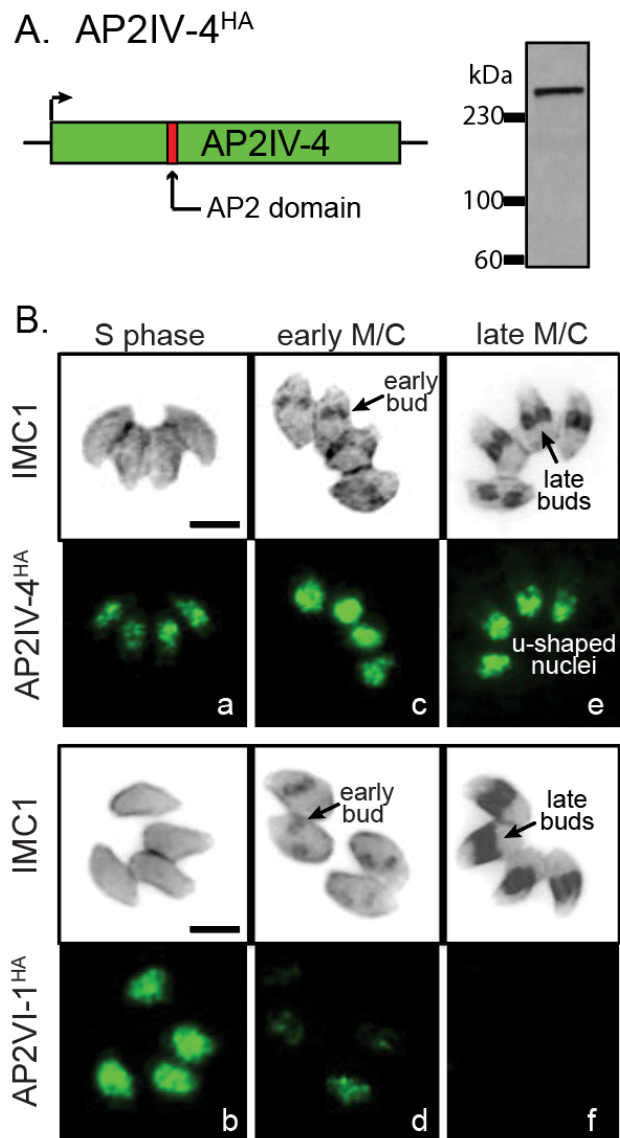

**Figure S1: AP2IV-4 and AP2VI-1 expression during daughter budding.**

**(A.)** The AP2IV-4 single exon and AP2 domain gene is predicted to encode a ~250kDa protein ([http://toxodb.org/toxo/app/record/gene/TGME49\\_318470](http://toxodb.org/toxo/app/record/gene/TGME49_318470)), which was confirmed by Western analysis ( $\alpha$ -HA) of AP2IV-4<sup>HA</sup> parasites (plus 3xHA, actual protein size is ~254kDa). Molecular mass standards indicated on the left. **(B.)** IFA analysis of AP2IV-4<sup>HA</sup> and AP2VI-1<sup>HA</sup> transgenic parasites grown in HFF monolayers utilized co-stains  $\alpha$ -HA (green, AP2IV-4<sup>HA</sup> or AP2VI-1<sup>HA</sup> expression) and  $\alpha$ -IMC1 (black and white panels). To improve visualization of internal bud structures, IMC1 images were decolorized and then inverted. AP2IV-4<sup>HA</sup> and AP2VI-1<sup>HA</sup> are exclusively localized to the nucleus and the relative cell cycle expression profile predicted by the cyclical mRNA patterns (Fig. 1A, green and red curves) was confirmed for each factor. Black scale bar=5  $\mu$ m

**A. Rapamycin-induced AP2IV-4 KO in RHC*Cre*-AP2IV-4<sup>floxed</sup> parent strain.**

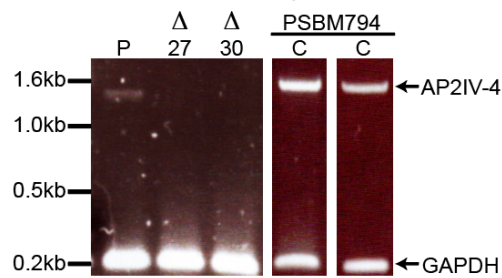

**B. Strategy for AP2IV-4 KO in PruQ strain**

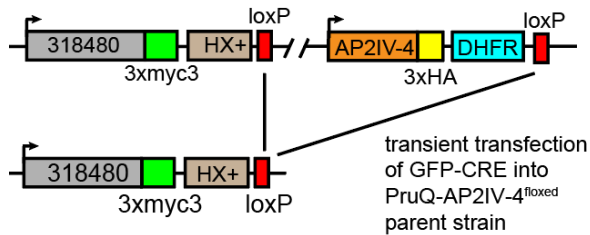

**C. AP2IV-4 KO in PruQ-AP2IV-4<sup>floxed</sup> parent strain.**

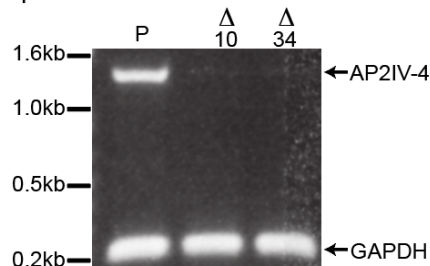

**Figure S2: Genetic knockout strategy for AP2IV-4.**

**(A.)** Verification of AP2IV-4 knockout by RT-PCR in the RHC*Cre*- $\Delta$ *ap2IV-4* transgenic clones. AP2IV-4 mRNA is detected in lane P (parent strain, RHC*Cre*-AP2IV-4<sup>floxed</sup>), but absent from both AP2IV-4 knockout clones evaluated (RHC*Cre*- $\Delta$ *ap2IV-4* clones 27, and 30). For a diagram of the RHC*Cre* knockout strategy see Figure 3A. Complementation for the loss of AP2IV-4 in RHC*Cre*- $\Delta$ *ap2IV-4* parasites was accomplished using cosmid PSBM794, which reintroduces a full copy of the AP2IV-4 gene and restores AP2IV-4 mRNA expression (C lanes). **(B.)** Diagram of the AP2IV-4 knockout strategy in Type II PruQ parasites, which is similar to the knockout of AP2IV-4 in the RHC*Cre* strain (see Fig. 3A). Here transient transfection of pMIN-CRE-eGFP plasmid [36] into the PruQ-AP2IV-4<sup>floxed</sup> strain was required to introduce active Cre recombinase. **(C.)** Parent strain PruQ-AP2IV-4<sup>floxed</sup> (lane P) expresses the expected AP2IV-4 transcript, whereas PruQ- $\Delta$ *ap2IV-4* clones 10 and 34 (lanes  $\Delta$ 10 and  $\Delta$ 34) lack the AP2IV-4 mRNA. AP2IV-4 cDNA primers amplify a 1367bp fragment of the single exon gene (7221bp full length). For loading and template quality control, GAPDH primers were designed around a 432bp intron, allowing detection of both mRNA (202bp, intron spliced out) and contaminating genomic DNA (634 bp). The absence of a detectable 634bp amplicon in all samples indicates the RNA templates were free of genomic DNA contamination. See Dataset S3 for all primer designs.

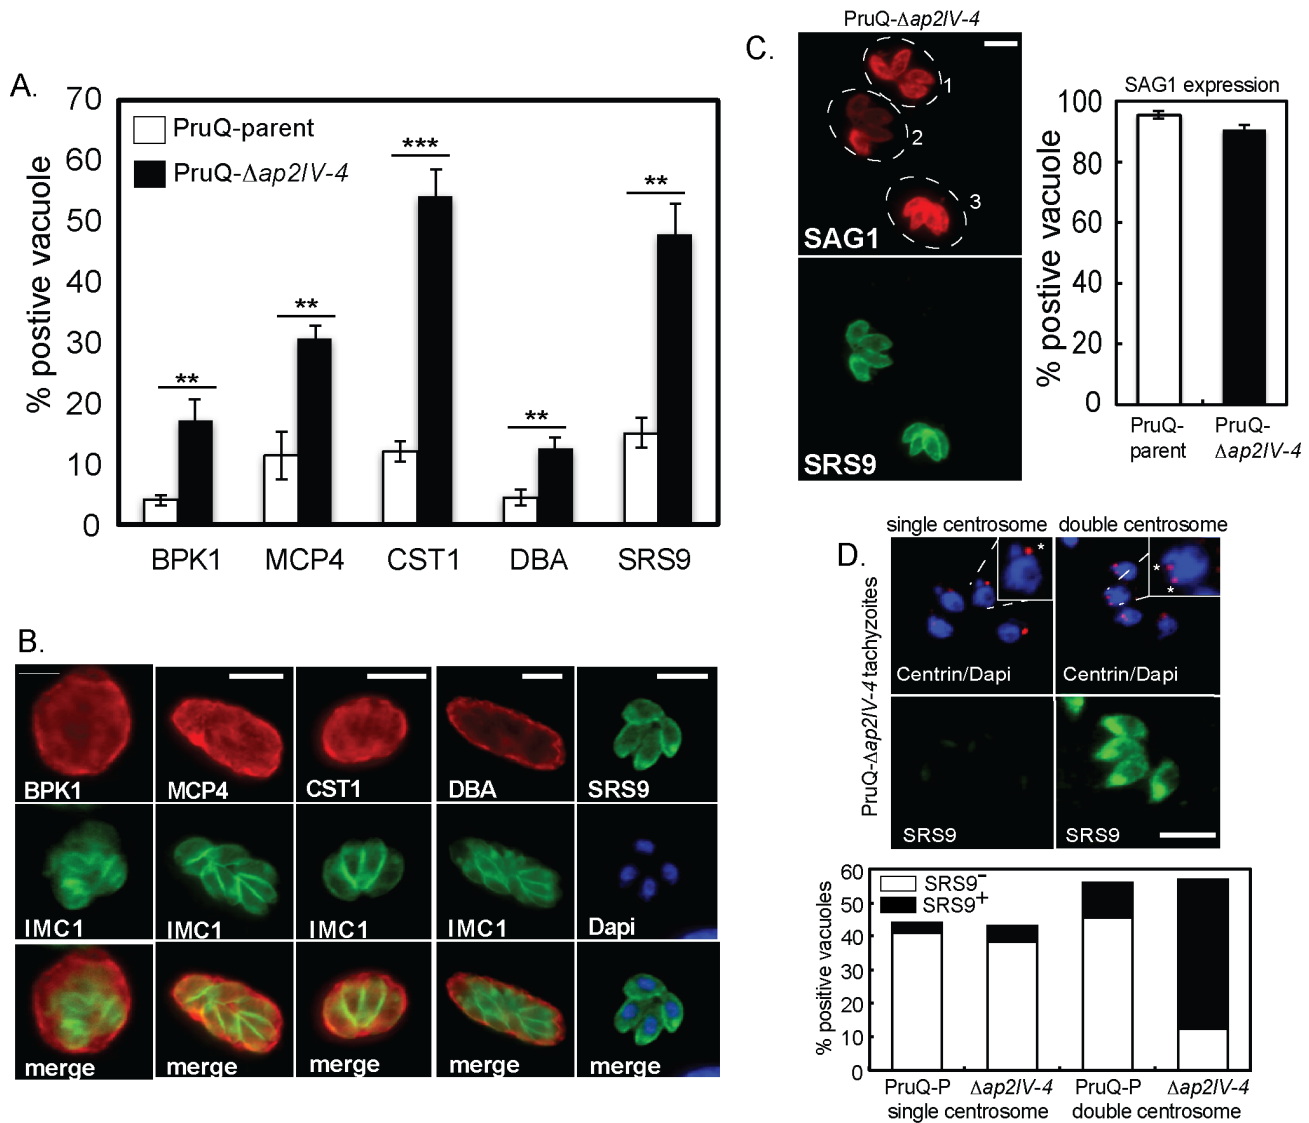

**Figure S3: Deletion of the AP2IV-4 gene in the PruQ strain leads to de-repression of bradyzoite surface and cyst wall mRNAs and proteins in the tachyzoite stage.**

(A.) Average fraction of vacuoles forming tissue cysts (DBA+) and misexpressing bradyzoite cyst wall proteins BPK1, MPC4, CST1 and the bradyzoite-specific surface antigen SRS9 in PruQ- $\Delta ap2IV-4$  versus the PruQ-AP2IV-4<sup>flxed</sup> parent strain with representative IFA images in (B.) Statistical significance of pairwise parent versus knockout results in (A.) is indicated (\*\*,  $p < 0.01$ ; \*\*\*,  $p < 0.001$ ). Positive staining for each antigen and DBA+ vacuoles were quantified in triplicate by counting 100 vacuoles from randomly selected microscopic fields. Note also the proper localization of BPK1, CST1, and MCP4 in cyst walls also stained by DBA and the parasite surface localization of SRS9. Scale bar=5  $\mu$ m. (C.) The tachyzoite nature of SRS9+ PruQ- $\Delta ap2IV-4$  parasites was confirmed by IFA analysis with  $\alpha$ SRS9 and  $\alpha$ SAG1 antibodies. The expression of SRS9 in PruQ- $\Delta ap2IV-4$  parasites was nearly ~50% (as shown in A.), and thus, about half the population was SAG1+/SRS9- (#1 vacuole of four parasites circled). Nearly all PruQ- $\Delta ap2IV-4$  parasites expressing SRS9+ were also positive for SAG1+ surface expression (representative vacuole #3 circled). The fraction of SAG1+ positive vacuoles in PruQ-parent and PruQ- $\Delta ap2IV-4$  (SRS9- and SRS9+) infected HFF cell cultures were quantified (see graph). In rare examples, PruQ- $\Delta ap2IV-4$  parasites that were SRS9+ also showed diminished SAG1 expression (#2 vacuole circled). Scale bar=5  $\mu$ m (D.) The cell cycle distribution of SRS9+ parasites in PruQ- $\Delta ap2IV-4$  versus the PruQ-AP2IV-4<sup>flxed</sup> parent strains was determined by IFA analysis with  $\alpha$ SRS9 and  $\alpha$ Centrin (centrosome marker) antibodies. Representative PruQ- $\Delta ap2IV-4$  co-stained images demonstrate the

association of SRS9 expression with parasites containing duplicated centrosomes (S/M/C phases) that was quantified and graphed for PruQ- $\Delta ap2IV-4$  and the PruQ-AP2IV-4<sup>fixed</sup> parent strains. All parasite counts were determined in triplicate from 100 vacuoles selected at random. The association of SRS9+ expression in S phase and mitotic PruQ- $\Delta ap2IV-4$  parasites (duplicated centrosome) versus G1 phase (single centrosome) parasites was statistically significant ( $p < 0.001$ ). Scale bar=5  $\mu$ m.

**Dataset S1:** Combined lists of mRNAs altered >2 fold in RHC*Cre-Δap2IV-4* or PruQ-*Δap2IV-4* parasites grown as tachyzoites in normal pH 7.0 media (GSE93531). Yellow highlighted genes are changed >2 fold in the same direction in both knockout parasites, Grey highlighted genes are >2 fold changed in RHC*Cre-Δap2IV-4* parasites, and white highlighted genes are >2-fold changed in PruQ-*Δap2IV-4* parasites. In general, mRNAs increased >2-fold in RHC*Cre-Δap2IV-4* parasites show higher baseline expression in Pru parental parasites leading to lower fold changes in PruQ-*Δap2IV-4* parasites. However, >90% of mRNAs >2-fold in RHC*Cre-Δap2IV-4* parasites also show expression changes in PruQ-*Δap2IV-4* parasites in the same direction either up or down regulated. Values for baseline mRNA expression in Type III CTG parasites (see GEO accession GSE89469) was included for those genes increased >2-fold in RHC*Cre-Δap2IV-4* parasites to show that higher baseline mRNA expression is a characteristic of strains that have a greater capacity to develop into the tissue cyst; nearly 70% of CTG mRNAs showed higher baseline expression than in RH parental parasites. GAPDH2 expression was included here as an internal reference for constitutive mRNA expression across all datasets; there is a 1.5 fold difference in GAPDH2 expression across all the datasets.

| ToxoDB ID     | Parent RHC <i>Cre-AP2IV-4</i> <sup>flxed</sup> | RHC <i>Cre-Δap2IV-4</i> | Fold Change <i>Δap2IV-4</i> vs parent | RHC <i>Cre-Δap2IV-4</i> comp. | Fold Change complemented vs parent | Description                                 | PruQ-AP2IV-4 <sup>HA</sup> | PruQ- <i>Δap2IV-4</i> | Fold Change | CTG    |
|---------------|------------------------------------------------|-------------------------|---------------------------------------|-------------------------------|------------------------------------|---------------------------------------------|----------------------------|-----------------------|-------------|--------|
| TGME49_261650 | 30.1                                           | 517.4                   | 17.2                                  | 48.2                          | 1.6                                | hypothetical protein                        | 144.3                      | 430.2                 | 3.0         | 261.8  |
| TGME49_207150 | 19.8                                           | 320.8                   | 16.2                                  | 36.6                          | 1.8                                | SRS49C (= SAG2D)                            | 224.6                      | 401.8                 | 1.8         | 474.1  |
| TGME49_216140 | 20.9                                           | 323.7                   | 15.5                                  | 58.5                          | 2.8                                | tetratricopeptide repeat-containing protein | 36.4                       | 301.8                 | 8.3         | 1742.4 |
| TGME49_280580 | 59.6                                           | 709.7                   | 11.9                                  | 116.3                         | 2.0                                | SAG4 homolog (SAG4.2)                       | 1046.2                     | 1899.6                | 1.8         | 4454.9 |
| TGME49_301890 | 33.3                                           | 394.2                   | 11.8                                  | 153.4                         | 4.6                                | Toxoplasma gondii family B protein          | 473.2                      | 541.9                 | 1.1         | 390.4  |
| TGME49_253330 | 42.4                                           | 455.8                   | 10.7                                  | 29.3                          | 0.7                                | BPK1                                        | 835.1                      | 2315.6                | 2.8         | 1018.1 |
| TGME49_207210 | 8.5                                            | 67.7                    | 8.0                                   | 26.5                          | 3.1                                | hypothetical protein                        | 209.5                      | 903.5                 | 4.3         | 233.8  |
| TGME49_320190 | 23.9                                           | 183.6                   | 7.7                                   | 56.5                          | 2.4                                | SRS16B (= SRS9)                             | 28.0                       | 256.7                 | 9.2         | 17.1   |
| TGME49_207130 | 49.0                                           | 372.9                   | 7.6                                   | 54.0                          | 1.1                                | SRS49A (= SAG2Y)                            | 171.2                      | 833.7                 | 4.9         | 2151.8 |
| TGME49_208730 | 88.8                                           | 588.8                   | 6.6                                   | 97.6                          | 1.1                                | MCP4                                        | 249.0                      | 887.6                 | 3.6         | 141.5  |
| TGME49_225290 | 8.3                                            | 38.5                    | 4.6                                   | 11.5                          | 1.4                                | bradyzoite-NTPase                           | 24.9                       | 102.4                 | 4.1         | 428.6  |
| TGME49_208740 | 654.5                                          | 2872.4                  | 4.4                                   | 721.7                         | 1.1                                | microneme protein                           | 3657.3                     | 7389.4                | 2.0         | 226.5  |
| TGME49_237170 | 64.1                                           | 242.2                   | 3.8                                   | 73.4                          | 1.1                                | hypothetical protein                        | 934.6                      | 733.3                 | -1.3        | 292.1  |
| TGME49_290970 | 59.9                                           | 218.8                   | 3.7                                   | 112.5                         | 1.9                                | 8-amino-7-oxononanoate synthase             | 376.1                      | 1610.5                | 4.3         | 475.3  |
| TGME49_273110 | 49.8                                           | 163.0                   | 3.3                                   | 44.9                          | 0.9                                | SRS30D                                      | 13.3                       | 13.4                  | 1.0         | 19.1   |
| TGME49_215500 | 35.0                                           | 108.1                   | 3.1                                   | 30.3                          | 0.9                                | TPR repeat containing protein               | 43.9                       | 69.9                  | 1.6         | 28.9   |
| TGME49_250930 | 58.4                                           | 160.5                   | 2.7                                   | 130.1                         | 2.2                                | hypothetical protein                        | 49.7                       | 43.3                  | -1.1        | 52.3   |
| TGME49_235700 | 121.1                                          | 316.9                   | 2.6                                   | 281.1                         | 2.3                                | sedoheptulose-1,7 bisphosphatase            | 689.5                      | 681.0                 | -1.0        | 435.9  |
| TGME49_207140 | 241.8                                          | 619.8                   | 2.6                                   | 268.9                         | 1.1                                | SRS49B (= SAG2X)                            | 169.1                      | 496.3                 | 2.9         | 197.0  |
| TGME49_292260 | 24.9                                           | 62.0                    | 2.5                                   | 23.9                          | 1.0                                | SRS36B (= SAG5D)                            | 20.7                       | 100.4                 | 4.8         | 1364.3 |

|               |        |        |      |        |     |                                                  |        |        |      |        |
|---------------|--------|--------|------|--------|-----|--------------------------------------------------|--------|--------|------|--------|
| TGME49_250940 | 185.2  | 453.5  | 2.4  | 484.2  | 2.6 | hypothetical protein                             | 384.3  | 355.6  | -1.1 | 177.7  |
| TGME49_301210 | 98.7   | 236.0  | 2.4  | 91.8   | 0.9 | NAD(P) transhydrogenase                          | 254.1  | 523.7  | 2.1  | 610.5  |
| TGME49_236010 | 446.7  | 1066.0 | 2.4  | 477.7  | 1.1 | prenylcysteine oxidase                           | 1220.6 | 1893.2 | 1.6  | 1239.2 |
| TGME49_234440 | 203.7  | 444.3  | 2.2  | 172.3  | 0.8 | aminotransferase                                 | 189.0  | 639.8  | 3.4  | 144.4  |
| TGME49_246070 | 40.6   | 87.0   | 2.1  | 41.3   | 1.0 | SRS56A                                           | 22.2   | 24.5   | 1.1  | 32.5   |
| TGME49_213072 | 156.3  | 325.4  | 2.1  | 141.6  | 0.9 | Sec1 domain containing family                    | 182.1  | 176.8  | -1.0 | 746.0  |
| TGME49_227630 | 19.9   | 33.7   | 1.7  | 21.0   | 1.1 | hypothetical protein                             | 181.3  | 737.4  | 4.1  |        |
| TGME49_301170 | 198.6  | 319.2  | 1.6  | 142.3  | 0.7 | SRS19D                                           | 50.5   | 666.1  | 13.2 |        |
| TGME49_301180 | 385.4  | 570.3  | 1.5  | 302.2  | 0.8 | SRS19F                                           | 222.6  | 628.1  | 2.8  |        |
| TGME49_224770 | 19.5   | 27.4   | 1.4  | 21.5   | 1.1 | SRS40D                                           | 41.3   | 164.1  | 4.0  |        |
| TGME49_321480 | 24.9   | 34.0   | 1.4  | 22.7   | 0.9 | SRS12B                                           | 109.8  | 328.6  | 3.0  |        |
| TGME49_237090 | 6.9    | 8.9    | 1.3  | 9.1    | 1.3 | AP2X-5                                           | 232.7  | 104.4  | -2.2 |        |
| TGME49_293840 | 119.4  | 152.0  | 1.3  | 154.7  | 1.3 | hypothetical protein                             | 20.1   | 109.0  | 5.4  |        |
| TGME49_224710 | 30.2   | 37.2   | 1.2  | 27.0   | 0.9 | vacuolar sorting receptor protein                | 116.7  | 263.1  | 2.3  |        |
| TGME49_256800 | 6.9    | 8.1    | 1.2  | 8.6    | 1.3 | hypothetical protein                             | 60.1   | 126.1  | 2.1  |        |
| TGME49_301160 | 144.8  | 167.5  | 1.2  | 132.1  | 0.9 | SRS19C (= SRS7)                                  | 161.0  | 395.3  | 2.5  |        |
| TGME49_304930 | 22.1   | 22.7   | 1.0  | 29.0   | 1.3 | hypothetical protein                             | 58.1   | 153.2  | 2.6  |        |
| TGME49_255210 | 396.9  | 381.9  | -1.0 | 367.0  | 0.9 | ATPase, AAA family protein                       | 68.7   | 400.7  | 5.8  |        |
| TGME49_231960 | 645.5  | 600.3  | -1.1 | 537.7  | 0.8 | omega secalin, putative                          | 755.6  | 320.8  | -2.4 |        |
| TGME49_251170 | 35.8   | 32.8   | -1.1 | 26.9   | 0.8 | KRUF family protein                              | 341.8  | 107.8  | -3.2 |        |
| TGME49_295100 | 139.5  | 127.4  | -1.1 | 129.2  | 0.9 | hypothetical protein                             | 234.2  | 114.4  | -2.0 |        |
| TGME49_240060 | 598.8  | 538.4  | -1.1 | 461.0  | 0.8 | hypothetical protein                             | 1304.6 | 542.9  | -2.4 |        |
| TGME49_315290 | 206.0  | 185.0  | -1.1 | 153.1  | 0.7 | hypothetical protein                             | 359.0  | 170.9  | -2.1 |        |
| TGME49_265150 | 106.0  | 90.2   | -1.2 | 98.9   | 0.9 | hypothetical protein                             | 197.5  | 489.7  | 2.5  |        |
| TGME49_246710 | 41.5   | 34.9   | -1.2 | 35.4   | 0.9 | hypothetical protein                             | 118.7  | 51.7   | -2.3 |        |
| TGME49_205370 | 85.8   | 70.0   | -1.2 | 47.6   | 0.6 | hypothetical protein                             | 114.9  | 51.8   | -2.2 |        |
| TGME49_268210 | 54.9   | 44.8   | -1.2 | 57.4   | 1.0 | AGC kinase                                       | 76.8   | 189.5  | 2.5  |        |
| TGME49_264870 | 93.7   | 71.9   | -1.3 | 61.7   | 0.7 | Sodium:neurotransmitter symporter family protein | 337.3  | 145.9  | -2.3 |        |
| TGME49_229220 | 187.1  | 132.7  | -1.4 | 198.0  | 1.1 | hypothetical protein                             | 496.2  | 213.1  | -2.3 |        |
| TGME49_286150 | 35.3   | 25.0   | -1.4 | 26.5   | 0.7 | PAN/Apple domain-containing protein              | 156.9  | 347.6  | 2.2  |        |
| TGME49_277490 | 47.3   | 33.3   | -1.4 | 45.6   | 1.0 | hypothetical protein                             | 108.3  | 50.0   | -2.2 |        |
| TGME49_262050 | 1286.2 | 899.1  | -1.4 | 1173.3 | 0.9 | Rhoptry kinase family protein ROP39              | 1748.8 | 694.8  | -2.5 |        |
| TGME49_271770 | 26.7   | 18.0   | -1.5 | 23.8   | 0.9 | hypothetical protein                             | 150.0  | 74.2   | -2.0 |        |
| TGME49_239600 | 211.8  | 131.4  | -1.6 | 225.1  | 1.1 | ROP23 (incomplete catalytic triad)               | 1136.4 | 344.4  | -3.3 |        |

|               |        |        |       |        |     |                                     |        |        |       |
|---------------|--------|--------|-------|--------|-----|-------------------------------------|--------|--------|-------|
| TGME49_218550 | 160.2  | 99.0   | -1.6  | 116.5  | 0.7 | PIK3R4 kinase-related protein       | 281.2  | 95.5   | -2.9  |
| TGME49_250820 | 113.4  | 69.9   | -1.6  | 79.3   | 0.7 | hypothetical protein                | 171.0  | 77.3   | -2.2  |
| TGME49_297180 | 131.3  | 78.4   | -1.7  | 100.7  | 0.8 | hypothetical protein                | 277.1  | 126.0  | -2.2  |
| TGME49_255190 | 670.2  | 378.3  | -1.8  | 539.1  | 0.8 | myosin C                            | 843.6  | 350.3  | -2.4  |
| TGME49_224530 | 367.6  | 206.5  | -1.8  | 290.8  | 0.8 | IMC5 (ALV11)                        | 491.6  | 232.3  | -2.1  |
| TGME49_272520 | 675.2  | 371.4  | -1.8  | 739.3  | 1.1 | hypothetical protein                | 688.6  | 247.1  | -2.8  |
| TGME49_226290 | 180.6  | 96.0   | -1.9  | 136.2  | 0.8 | hypothetical protein                | 220.9  | 110.3  | -2.0  |
| TGME49_289600 | 1485.4 | 705.6  | -2.1  | 1545.8 | 1.0 | HSP29                               | 2599.6 | 967.2  | -2.7  |
| TGME49_200230 | 734.5  | 335.5  | -2.2  | 788.3  | 1.1 | MIC17C                              | 2599.0 | 825.9  | -3.1  |
| TGME49_232280 | 394.4  | 178.8  | -2.2  | 400.6  | 1.0 | hypothetical protein                | 551.7  | 243.7  | -2.3  |
| TGME49_289100 | 111.9  | 52.0   | -2.2  | 91.8   | 0.8 | hypothetical protein                | 188.8  | 104.9  | -1.8  |
| TGME49_306270 | 1059.4 | 428.6  | -2.2  | 1203.8 | 1.1 | hypothetical protein                | 624.3  | 259.8  | -2.4  |
| TGME49_232410 | 3042.2 | 1129.2 | -2.7  | 3393.0 | 1.1 | PDI family protein                  | 6234.5 | 2218.5 | -2.8  |
| TGME49_229930 | 1041.2 | 373.8  | -2.8  | 1046.5 | 1.0 | p25-alpha domain-containing protein | 1460.2 | 463.0  | -3.2  |
| TGME49_292110 | 82.5   | 30.0   | -2.8  | 96.8   | 1.2 | formate/nitrite transporter         | 279.8  | 159.0  | -1.8  |
| TGME49_221630 | 123.9  | 40.7   | -3.0  | 101.7  | 0.8 | hypothetical protein                | 204.7  | 108.2  | -1.9  |
| TGME49_233300 | 89.1   | 25.6   | -3.5  | 69.4   | 0.8 | rhoGAP protein                      | 124.9  | 41.2   | -3.0  |
| TGME49_276930 | 465.7  | 129.4  | -3.6  | 502.2  | 1.1 | hypothetical protein                | 1461.8 | 451.6  | -3.2  |
| TGME49_225790 | 346.0  | 76.9   | -4.5  | 316.1  | 0.9 | PDI family protein                  | 499.9  | 118.7  | -4.2  |
| TGME49_226310 | 195.8  | 12.5   | -15.7 | 67.8   | 0.3 | zinc finger (CCCH type)             | 59.5   | 11.9   | -5.0  |
| TGME49_318470 | 191.6  | 6.4    | -29.9 | 36.1   | 0.2 | AP2IV-4                             | 195.6  | 11.6   | -16.8 |
| TGME49_289690 | 6743.8 | 5795.6 | -1.2  | 7341.5 | 1.1 | GAPDH2                              | 8915.0 | 8402.1 | -1.1  |



**Dataset S2 Common and specific gene targets of four ApiAP2 transcription factors (two prepressors, AP2IV-4 & AP2IX-9, and two activators, AP2XI-4 & AP2IV-3). Column G indicates genes included in Figure 6 of the main paper.**

| Gene ID       | AP2IV-3 | AP2XI-4 | AP2IV-4 | AP2IX-9 | Product Name                                | Summary Fig |
|---------------|---------|---------|---------|---------|---------------------------------------------|-------------|
| TGME49_207210 | x       | x       | x       | x       | hypothetical protein (UNK)                  |             |
| TGME49_202020 |         | x       | x       | x       | DnaK-TPR                                    |             |
| TGME49_207130 |         | x       | x       | x       | SRS49A (= SAG2Y)                            |             |
| TGME49_208740 | x       |         | x       | x       | microneme protein (MIC UNK)                 |             |
| TGME49_216140 |         | x       | x       | x       | tetratricopeptide repeat-containing protein |             |
| TGME49_225290 |         | x       | x       | x       | bradyzoite-NTPase (B-NTPase)                | x           |
| TGME49_253330 |         | x       | x       | x       | BPK1                                        | x           |
| TGME49_252640 | x       | x       |         | x       | TgPMA1                                      |             |
| TGME49_259020 | x       | x       |         | x       | bradyzoite antigen (BAG1)                   | x           |
| TGME49_261650 |         | x       | x       | x       | hypothetical protein                        |             |
| TGME49_280580 |         | x       | x       | x       | SAG-related sequence SRS35B (SAG4.2)        |             |
| TGME49_291040 | x       | x       |         | x       | lactate dehydrogenase (LDH2)                | x           |
| TGME49_207140 |         |         | x       | x       | SRS49B (= SAG2X)                            |             |
| TGME49_207150 |         | x       |         | x       | SAG-related sequence SRS49C                 |             |
| TGME49_208730 |         |         | x       | x       | MCP4                                        | x           |
| TGME49_240470 | x       | x       |         |         | hypothetical protein                        |             |
| TGME49_268860 |         | x       |         | x       | enolase 1 (ENO1)                            | x           |
| TGME49_280570 |         | x       |         | x       | SAG-related sequence SRS35A                 |             |
| TGME49_267670 | x       |         |         | x       | hypothetical protein                        |             |
| TGME49_290970 |         |         | x       | x       | 8-amino-7-oxononanoate synthase             |             |
| TGME49_320190 |         | x       | x       |         | SRS16B (= SRS9)                             | x           |
| TGME49_203290 |         |         |         | x       | hypothetical protein                        |             |
| TGME49_207150 |         |         | x       |         | SRS49C (= SAG2D)                            | x           |
| TGME49_209755 |         |         |         | x       | hypothetical protein                        |             |
| TGME49_209985 |         |         |         | x       | cAMP-dependent protein kinase               |             |
| TGME49_213072 |         |         | x       |         | Sec1 domain containing family               |             |
| TGME49_215500 |         |         | x       |         | TPR repeat containing protein               |             |

|               |   |   |   |   |                                              |   |
|---------------|---|---|---|---|----------------------------------------------|---|
| TGME49_215775 | x |   |   |   | Rhoptry kinase family protein ROP8           | x |
| TGME49_218910 |   |   |   | x | hypothetical protein                         |   |
| TGME49_221550 |   | x |   |   | CMGC kinase, MAPK family, MEK kinase-related |   |
| TGME49_224170 |   | x |   |   | SRS domain-containing protein                |   |
| TGME49_227430 | x |   |   |   | hypothetical protein                         |   |
| TGME49_232400 |   |   |   | x | PAN domain-containing protein                |   |
| TGME49_234440 |   |   | x |   | aminotransferase                             |   |
| TGME49_235700 |   |   | x |   | sedoheptulose-1,7 bisphosphatase             |   |
| TGME49_236010 |   |   | x |   | prenylcysteine oxidase                       |   |
| TGME49_237170 |   |   | x |   | hypothetical protein                         |   |
| TGME49_238440 | x |   |   |   | SRS22A                                       |   |
| TGME49_240930 |   |   |   | x | MoaC family protein                          |   |
| TGME49_246070 |   |   | x |   | SRS56A                                       |   |
| TGME49_250930 |   |   | x |   | hypothetical protein                         |   |
| TGME49_250940 |   |   | x |   | hypothetical protein                         |   |
| TGME49_253340 |   | x |   |   | hypothetical protein                         |   |
| TGME49_255210 |   |   |   | x | ATPase, AAA family protein                   |   |
| TGME49_264150 | x |   |   |   | hypothetical protein                         |   |
| TGME49_268210 |   |   |   | x | AGC kinase                                   |   |
| TGME49_268220 |   |   |   | x | hypothetical protein                         |   |
| TGME49_273110 |   |   | x |   | SRS30D                                       |   |
| TGME49_278080 |   | x |   |   | hypothetical protein                         |   |
| TGME49_286000 | x |   |   |   | hypothetical protein                         |   |
| TGME49_289920 |   |   |   | x | hypothetical protein                         |   |
| TGME49_290000 |   |   |   | x | hypothetical protein                         |   |
| TGME49_291910 |   |   |   | x | hypothetical protein                         |   |
| TGME49_292260 |   |   | x |   | SRS36B (= SAG5D)                             |   |
| TGME49_293790 |   |   |   | x | hypothetical protein                         |   |
| TGME49_301210 |   |   | x |   | NAD(P) transhydrogenase                      |   |
| TGME49_301890 |   |   | x |   | Toxoplasma gondii family B protein           |   |

|               |   |   |  |   |                                                    |   |
|---------------|---|---|--|---|----------------------------------------------------|---|
| TGME49_306450 |   |   |  | x | short chain dehydrogenase family protein, putative |   |
| TGME49_311370 |   | x |  |   | Methylmalonate-semialdehyde dehydrogenase          |   |
| TGME49_314250 | x |   |  |   | bradyzoite rhoptry protein BRP1                    | x |
| TGME49_319340 |   |   |  | x | hypothetical protein                               |   |

### Dataset S3 Oligonucleotides used in this study.

| Oligonucleotide function                                                                | Gene/locus   | Orientation | Oligonucleotides (5'->3')                                         |
|-----------------------------------------------------------------------------------------|--------------|-------------|-------------------------------------------------------------------|
| <b>Tagging of endogenous gene loci with 3xhemagglutinin (HA) or 3x MYC epitope tags</b> |              |             |                                                                   |
| LIC 5' primer for AP2IV-4                                                               | AP2IV-4      | Forward     | TACTTCCAATCCAATTTAATGCGACTCTCTCTGCCATTGGCCCG                      |
| LIC 3' primr for AP2IV-4                                                                | AP2IV-4      | Reverse     | TCCTCCACTTCCAATTTTAGCGGCGAGCATGATGGTCTGCTTGACGTC                  |
| LIC AP2IV-4 5' primer to check for recombination                                        | AP2IV-4      | Forward     | CAGGAGCTGTGTGAGCACGAGC                                            |
| LIC-HA 3' primer to check for 3' recombination                                          | N/A          | Reverse     | CGCATATCGGGCACATCATAGGGAT                                         |
|                                                                                         |              |             |                                                                   |
| LIC 5' primer for TGGT1_318480                                                          | TGGT1_318480 | Forward     | TACTTCCAATCCAATTTAATGCTGGTCCCGAGAAGAACCATGAG                      |
| LIC 3' primr for TGGT1_318480                                                           | TGGT1_318480 | Reverse     | TCCTCCACTTCCAATTTTAGCTACAGGTGCGTCCTGTAAGGAAC TGCT                 |
| LIC TGGT1_318480 5' primer to check for recombination                                   | TGGT1_318480 | Forward     | GGAACGTGAGGCCGATGATGG                                             |
| LIC-MYC 3' primer to check for 3' recombination                                         | N/A          | Reverse     | CTGTGTGAAATGCCACATGAAGAGTC                                        |
|                                                                                         |              |             |                                                                   |
| LIC 5' primer for AP2VI-1                                                               | AP2VI-1      | Forward     | TACTTCCAATCCAATTTAATGCGAACAGACATTACATCGGACTTATCTCCAAC             |
| LIC 3' primr for AP2VI-1                                                                | AP2VI-1      | Reverse     | TCCTCCACTTCCAATTTTAGCCGCGTGGGCCGCTGATACTTCA GC                    |
| LIC AP2VI-1 5' primer to check for recombination                                        | AP2VI-1      | Forward     | GAG AAG CAA GAG GCC ACA GAG GCC                                   |
| LIC-HA 3' primer to check for 3' recombination                                          | N/A          | Reverse     | CGCATATCGGGCACATCATAGGGAT                                         |
|                                                                                         |              |             |                                                                   |
| <b>Introduction of loxP sites into pLIC vectors</b>                                     |              |             |                                                                   |
| insertion of loxP site into pLIC vectors                                                | N/A          | Forward     | attgggccATAACTTCGTATAGCATAACATTATACGAAGTTATgctggcgt aatagcgaagagg |
| insertion of loxP site into pLIC vectors                                                | N/A          | Reverse     | attgggcccgattaagttgggtaacgccag                                    |

|                                                 |                                 |         |                                                                                                              |
|-------------------------------------------------|---------------------------------|---------|--------------------------------------------------------------------------------------------------------------|
| <b>AP2IV-4 3 fragment knockout constructs</b>   |                                 |         |                                                                                                              |
| attB4 AP2IV-4                                   | 5' UTR AP2IV-4                  | Forward | GGGGACAACCTTTGTATAGAAAAGTTGAAGACGGTGACGGTGGTACGGTTG                                                          |
| attB1r AP2IV-4                                  | 5' UTR AP2IV-4                  | Reverse | GGGGACTGCTTTTTTGTACAACTTGCCCTGTGGAAGCCACTGCCTTG                                                              |
| attB2r AP2IV-4                                  | 3' UTR AP2IV-4                  | Forward | GGGGACAGCTTTTCTTGTACAAAGTGGAACGCAAGGCTGCCATGGAAGCG                                                           |
| attB3 AP2IV-4                                   | 3' UTR AP2IV-4                  | Reverse | GGGGACAACCTTTGTATAATAAAGTTGCCGACACTGAGGTGTGTGCGCG                                                            |
| AP2IV-4 3 Frag KO verify                        | 5' UTR AP2IV-4                  | Forward | GAGCCTGCCGTCGGACACTGG                                                                                        |
| AP2IV-4 3 Frag KO verify                        | 3' UTR AP2IV-4                  | Reverse | CTTCGCGTTCACCGAGGCGCC                                                                                        |
| <b>AP2IV-4 conditional expression construct</b> |                                 |         |                                                                                                              |
| cloning AP2IV-4 CDS into pCTDDHA3 (MfeI)        | AP2IV-4 CDS                     | Forward | atacaattgGCCGCACCCGCACCGAGCGCG                                                                               |
| cloning AP2IV-4 CDS into pCTDDHA3 (EcoRV)       | AP2IV-4 CDS                     | Reverse | tatgataTCAGGCGAGCATGATGGTCTGCTTGACGTCGCCAGAA<br>GGAGAGAGAAAAGACGCAATGTCTCCTGTCTCGCCTCCTTCC<br>GTCCCCTCTGTCGG |
| <b>Recombinant protein construct</b>            |                                 |         |                                                                                                              |
| pGEX4T3                                         | AP2IV-4 recombinant protein-PBM | Forward | TATGGATCCGTACCCTTGAGAGCAGACGTGAC                                                                             |
| pGEX4T3                                         | AP2IV-4 recombinant protein-PBM | Reverse | ATAGCGGCCGCGTGCGAGAGGCACAGTTTGCCTGA                                                                          |
| <b>Semi quantitative RT-PCR</b>                 |                                 |         |                                                                                                              |
| RT-PCR                                          | AP2IV-4 +5952 (from start)      | Forward | GTCGCGTGATCCGCGATCAGG                                                                                        |
| RT-PCR                                          | AP2IV-4 @ stop codon            | Reverse | GGCGAGCATGATGGTCTGCTTGACG                                                                                    |
| RT-PCR                                          | GAPDH                           | Forward | GTCAATCATTCTGTCAATTCGA                                                                                       |
| RT-PCR                                          | GAPDH                           | Reverse | ACACCATGTAGTCCAGGGACATG                                                                                      |
| RT-PCR                                          | CST1                            | Forward | CCTGTGGTTTTTCGAGCTTCC                                                                                        |
| RT-PCR                                          | CST1                            | Reverse | TCGAAGAGTGACGTAGCAGG                                                                                         |

|                                     |                      |         |                                                                  |
|-------------------------------------|----------------------|---------|------------------------------------------------------------------|
|                                     |                      |         |                                                                  |
| <b>DNA probes for EMSA</b>          |                      |         |                                                                  |
| EMSA                                | PBM motif validation | Forward | TTTGTAAATATACGCTCCACCGCGTGCACCCCCCTCGACATGCC<br>CCCGTATTGCTGATCG |
| EMSA                                | PBM motif validation | Reverse | CGATCAGCAATACGGGGGCATGTCGAGGGGGGTGCACGCGG<br>TGGAGCGTATATTACAAA  |
| EMSA                                | PBM scrambled cold   | Forward | TACCCTGCCTCTTGTAGTAGTAACGTAAAAGAGGTAACGTGGT<br>CAAATGCGATCAGAGAT |
| EMSA                                | PBM scrambled cold   | Reverse | ATCTCTGATCGCATTGACCACGTTACCTCTTTTACGTTACTACT<br>ACAAGAGGCAGGGTA  |
|                                     |                      |         |                                                                  |
| <b>Target regions for CHIP-qPCR</b> |                      |         |                                                                  |
| ChIP-qPCR                           | SRS9 region 1        | Forward | GGACTTCTTGGATCCATTTTC                                            |
| ChIP-qPCR                           | SRS9 region 1        | Reverse | AGACTCTGACACAGGGA                                                |
| ChIP-qPCR                           | SRS9 region 2        | Forward | TGCCAGAAATCCCACAA                                                |
| ChIP-qPCR                           | SRS9 region 2        | Reverse | TAGTGTCGGAATCAAAGAGG                                             |
| ChIP-qPCR                           | SRS9 region 3        | Forward | CGGACTATCTGTGGCTTT                                               |
| ChIP-qPCR                           | SRS9 region 3        | Reverse | CACGAAAGCAAGGAACAC                                               |
| ChIP-qPCR                           | SRS9 region 4        | Forward | AGGTCTTCGACACAATCC                                               |
| ChIP-qPCR                           | SRS9 region 4        | Reverse | GCTGATTCACGTTGCTTC                                               |
| ChIP-qPCR                           | SRS9 region 5        | Forward | AAAGAGGAGAGCGGCTA                                                |
| ChIP-qPCR                           | SRS9 region 5        | Reverse | CACGGGTTTGCTTAAACG                                               |
| ChIP-qPCR                           | SRS9 region 6        | Forward | GAGCAGTCAGCTCTAGTAAT                                             |
| ChIP-qPCR                           | SRS9 region 6        | Reverse | GGACCCAATGATACAACATC                                             |
| ChIP-qPCR                           | SRS9 region 7        | Forward | TGACCTGATGTTTAGCAGTC                                             |
| ChIP-qPCR                           | SRS9 region 7        | Reverse | GACGATTGCTGCGAAGA                                                |
| ChIP-qPCR                           | SRS9 region 8        | Forward | GGCGTTTGTGACTGTAGA                                               |
| ChIP-qPCR                           | SRS9 region 8        | Reverse | GGTTCCTTGAGTTGTTGAAG                                             |
| ChIP-qPCR                           | BAG1 region 1        | Forward | GCCAGTCGAAAGCCATTA                                               |
| ChIP-qPCR                           | BAG1 region 1        | Reverse | TCACGCGTTCAGTCTACTC                                              |
| ChIP-qPCR                           | BAG1 region 2        | Forward | CGTCCTCTCTGTCCACGAAC                                             |

|           |               |         |                       |
|-----------|---------------|---------|-----------------------|
| ChIP-qPCR | BAG1 region 2 | Reverse | ATGGGGAAGTGGAGGAAGAT  |
| ChIP-qPCR | BAG1 region 3 | Forward | AGGTCGCCCCGTCTTATTCTT |
| ChIP-qPCR | BAG1 region 3 | Reverse | ACCCAAACATGGAGTTCAGG  |
| ChIP-qPCR | BAG1 region 4 | Forward | GACGAGTCCCGTTTTTCCT   |
| ChIP-qPCR | BAG1 region 4 | Reverse | ACAGAGGTCGCTGCGTAGAC  |
| ChIP-qPCR | BAG1 region 5 | Forward | CTTTTGCCAAAGGAGACCTG  |
| ChIP-qPCR | BAG1 region 5 | Reverse | ATGCCACTGAGCTACACACG  |
| ChIP-qPCR | BAG1 region 6 | Forward | GTCGTCTGTGAGAGCGTCAA  |
| ChIP-qPCR | BAG1 region 6 | Reverse | GACCTGGGCTTTGCAGATAA  |

### Database S3 Transgenic strains produced for this study

| Name in this study               | experimental use                                                 | Parent strain                | Transgene/selectable marker                                                                    | Drug Selection       | Clone # |
|----------------------------------|------------------------------------------------------------------|------------------------------|------------------------------------------------------------------------------------------------|----------------------|---------|
| AP2IV-4 <sup>HA</sup>            | endogenous expression of AP2IV-4                                 | RHΔ <i>hxgprtΔku80</i>       | endogenous promoter::AP2IV-4(3xHA)/DHFR-TS                                                     | pyrimethamine        | A2, C9  |
| RH- <sup>DD</sup> AP2IV-4        | conditional expression of AP2IV-4                                | RHΔ <i>hxgprt</i>            | tubulin promoter:(DD-3xHA)-AP2IV-4/sagCAT                                                      | chloramphenicol      | B5      |
| RHCre-318480 <sup>MYC</sup>      | endogenous expression of 318480                                  | RHΔ <i>hxgprtΔku80</i> diCRE | endogenous promoter::318480(3xMYC)/HXGPRT/loxP                                                 | pyrimethamine        | IB9     |
| RHCre-AP2IV-4 <sup>floxed</sup>  | endogenous expression of 318480 endogenous expression of AP2IV-4 | RHΔ <i>hxgprtΔku80</i> diCRE | endogenous promoter::318480(3xMYC)/HXGPRT/loxP<br>endogenous promoter::AP2VI-1(3xHA)/DHFR/loxP | pyrimethamine/HXGPRT | ID6     |
| RHCre-Δ <i>ap2IV-4</i>           | knockout of AP2IV-4                                              | RHΔ <i>hxgprtΔku80</i> diCRE | endogenous promoter::318480(3xMYC)/DHFR-TS/loxP                                                | HXGPRT               | 27, 30  |
| RHCre-Δ <i>ap2IV-4</i> ::AP2IV-4 | complemented AP2IV-4 knockout                                    | RHCre-Δ <i>ap2IV-4</i>       | endogenous promoter::318480(3xMYC)/DHFR-TS/loxP<br>cosmid PSBM794                              | HXGPRT, Phleomycin   | n/a     |
| PruQ-318480 <sup>MYC</sup>       | endogenous expression of 318480                                  | PruΔ <i>hxgprtΔku80</i>      | endogenous promoter::318480(3xMYC)/HXGPRT/loxP                                                 | HXGPRT               | B8      |
| PruQ-AP2IV-4 <sup>floxed</sup>   | endogenous expression of 318480 endogenous expression of AP2IV-4 | PruΔ <i>hxgprtΔku80</i>      | endogenous promoter::318480(3xMYC)/HXGPRT/loxP<br>endogenous promoter::AP2IV-4(3xHA)/DHFR/loxP | pyrimethamine/HXGPRT | C3      |
| PruQ-Δ <i>ap2IV-4</i>            | knockout of AP2IV-4                                              | PruΔ <i>hxgprtΔku80</i>      | endogenous promoter::318480(3xMYC)/DHFR-TS/loxP                                                | HXGPRT               | 10, 34  |
| AP2VI-1 <sup>HA</sup>            | endogenous expression of AP2VI-1                                 | RHΔ <i>hxgprtΔku80</i>       | endogenous promoter::AP2VI-1(3xHA)/DHFR-TS                                                     | pyrimethamine        | A2      |
